# Supplementary material
Source: MDPI journal article supplement (https://www.mdpi.com/2076-3263/9/10/453)
Supplement: s1 [file s1]

# Atmospheric Dynamics from Synoptic to Local Scale During an Intense Frontal Dust Storm over the Sistan Basin in Winter 2019

## Supplementary Figures

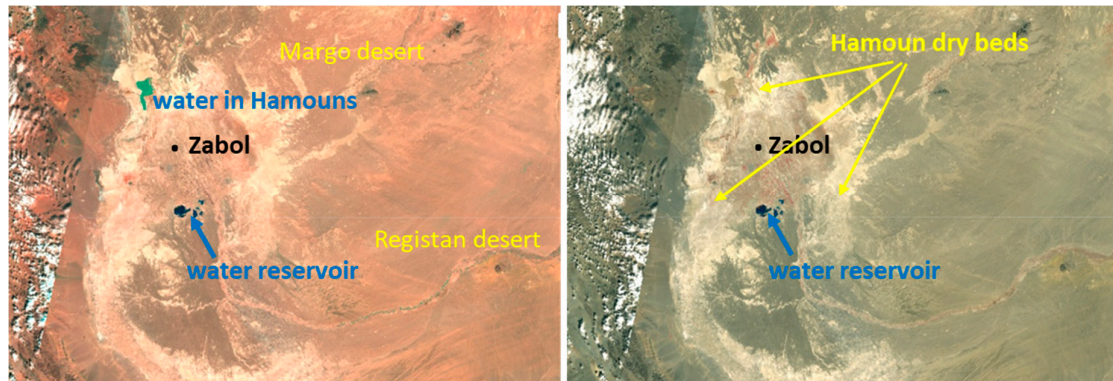

**Figure S1:** Sentinel imagery on 7 February 2019 over the Sistan Basin at 10 m spatial resolution. Left image corresponds to the bands 11, 4, 3 and the right one is composite of the bands 8, 4, 3, revealing vegetation in red around Zabol. Left image shows the water coverage in the Hamoun ephemeral lakes.

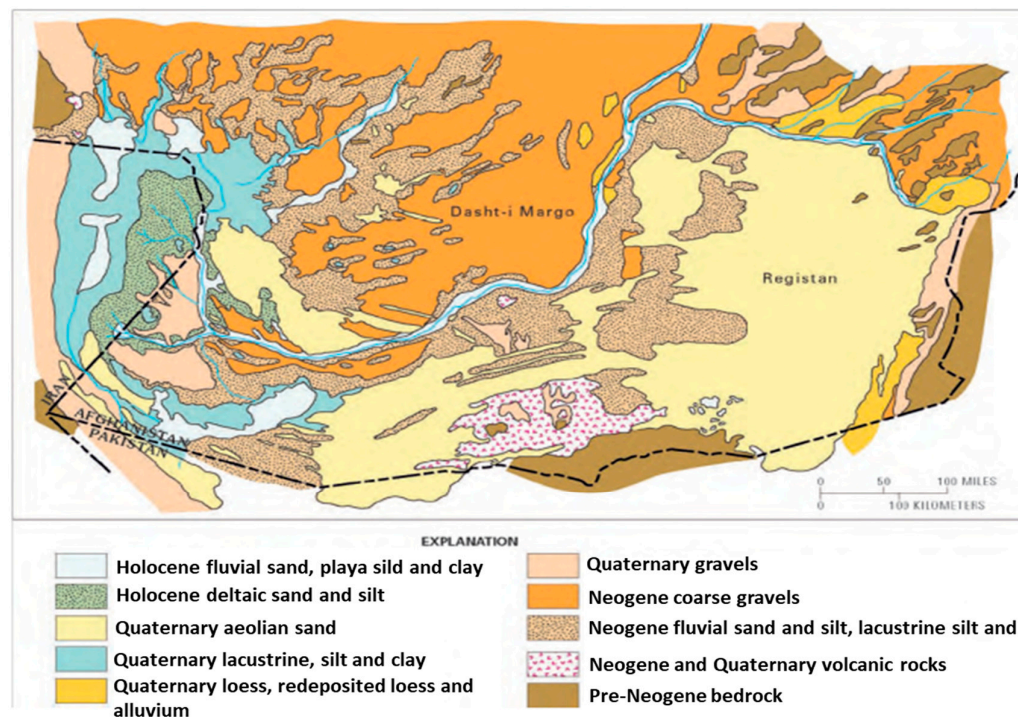

**Figure S2:** Geological map of the Sistan Basin. Source [British Geological Survey; <http://bgs.ac.uk/>].

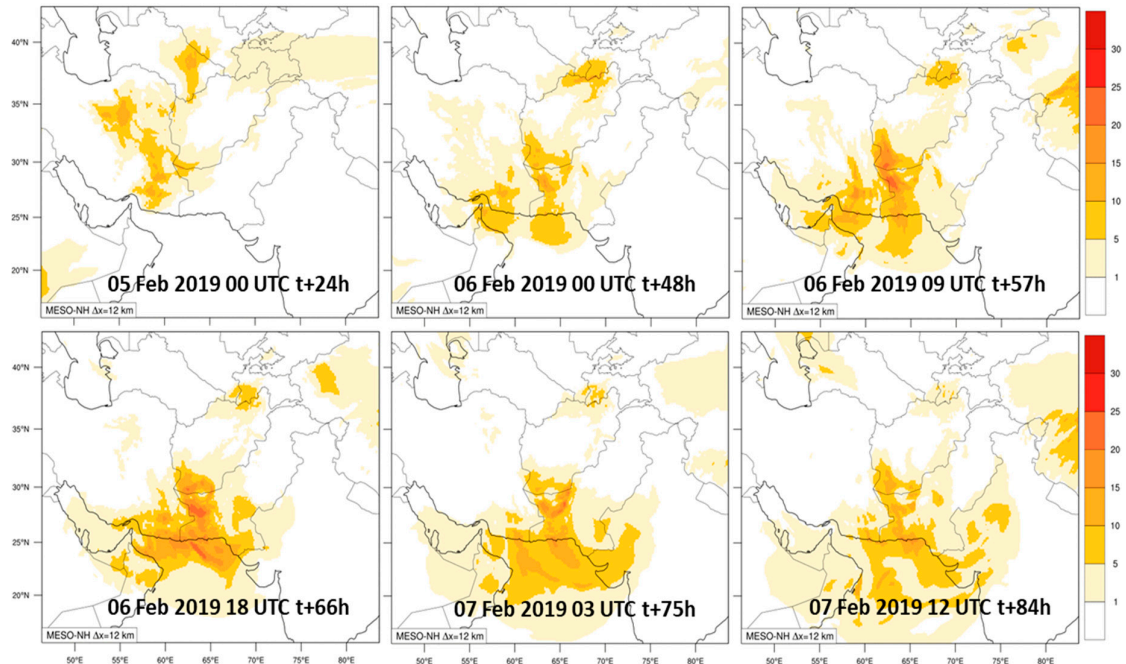

**Figure S3:** Spatial distribution of the accumulated dust loading (gm<sup>-2</sup>) simulated by Meso-NH for certain hours during 5-7 February 2019 over southwest Asia.
